# Supplementary material for: Drug Repositioning to Accelerate Drug Development Using Social Media Data: Computational Study on Parkinson Disease
Source: PubMed Central journal article supplement (PMC6231748; doi:10.2196/jmir.9646), 2018-10-11
Supplement: jmir_v20i10e271_app1.pdf [file jmir_v20i10e271_app1.pdf]

Multimedia Appendix 1. Repositioning drugs detected via each ADR.

|    |                           | Cramp muscle | Gastrointestinal disorder | Nervous system disorder | Angiopathy | Somnolence | Orthostatic hypotension | Carpal tunnel syndrome | Hallucination | Influenza | Num-ADR | Num - PubMed Article |
|----|---------------------------|--------------|---------------------------|-------------------------|------------|------------|-------------------------|------------------------|---------------|-----------|---------|----------------------|
| 1  | <b>amphotericin b</b>     |              |                           |                         | P          |            |                         |                        |               |           | 1       | 5                    |
| 2  | <b>bupropion</b>          |              |                           | 10                      |            |            |                         |                        |               |           | 1       | 4                    |
| 3  | <b>carbamazepine</b>      |              |                           | C                       |            |            |                         |                        |               |           | 1       | 7                    |
| 4  | <b>citalopram</b>         | F            |                           | P                       |            |            |                         |                        |               |           | 2       | 9                    |
| 5  | <b>clomipramine</b>       |              |                           |                         |            |            |                         |                        | C             |           | 1       | 3                    |
| 6  | <b>diltiazem</b>          |              |                           |                         |            |            | P                       |                        |               |           | 1       | 15                   |
| 7  | <b>donepezil</b>          |              |                           |                         |            |            |                         |                        |               | F         | 1       | 27                   |
| 8  | <b>fluoxetine</b>         |              | C                         |                         |            |            |                         |                        |               |           | 1       | 13                   |
| 9  | <b>fluvoxamine</b>        |              |                           |                         |            | C          |                         |                        |               |           | 1       | 4                    |
| 10 | <b>gabapentin</b>         |              |                           | P                       |            |            |                         |                        |               |           | 1       | 11                   |
| 11 | <b>glatiramer acetate</b> |              |                           | P                       |            |            |                         |                        |               |           | 1       | 7                    |
| 12 | <b>lamotrigine</b>        |              |                           |                         |            | 10         |                         |                        |               |           | 1       | 22                   |
| 13 | <b>levetiracetam</b>      |              | 10                        | P                       |            |            |                         |                        |               |           | 2       | 21                   |
| 14 | <b>methylphenidate</b>    |              | 10                        | 10                      |            |            |                         |                        |               |           | 2       | 20                   |
| 15 | <b>mirtazapine</b>        |              | P                         | P                       |            |            |                         |                        |               |           | 2       | 5                    |
| 16 | <b>modafinil</b>          |              | P                         | P                       |            |            |                         |                        |               |           | 2       | 10                   |
| 17 | <b>nefazodone</b>         |              |                           |                         | P          |            |                         |                        |               |           | 1       | 3                    |
| 18 | <b>oxcarbazepine</b>      |              |                           |                         |            | C          |                         |                        |               |           | 1       | 1                    |
| 19 | <b>paroxetine</b>         |              | C                         | P                       |            |            |                         |                        |               |           | 2       | 9                    |
| 20 | <b>phenytoin</b>          |              |                           |                         |            | 10         |                         |                        |               |           | 1       | 3                    |
| 21 | <b>rivastigmine</b>       |              |                           |                         |            |            | F                       |                        |               | F         | 2       | 32                   |
| 22 | <b>salbutamol</b>         | P            |                           |                         |            |            |                         |                        |               |           | 1       | 1                    |
| 23 | <b>sertraline</b>         |              | P                         | P                       |            |            |                         |                        |               |           | 2       | 5                    |
| 24 | <b>thalidomide</b>        |              | 10                        | C                       |            | 10         |                         |                        |               |           | 3       | 10                   |
| 25 | <b>topiramate</b>         |              | P                         | P                       |            | 10         |                         |                        |               |           | 3       | 2                    |
| 26 | <b>tramadol</b>           |              |                           | P                       | P          |            | P                       |                        | P             |           | 4       | 6                    |
| 27 | <b>valproic acid</b>      |              |                           |                         |            | 10         |                         |                        |               | 10        | 2       | 17                   |
| 28 | <b>ziprasidone</b>        |              | P                         | P                       | P          | 10         | P                       |                        |               | F         | 6       | 8                    |
|    | <b>Total</b>              | 2            | 10                        | 15                      | 4          | 8          | 4                       | 0                      | 2             | 4         |         |                      |
|    | <b>Total-only</b>         | 1            | 1                         | 4                       | 2          | 4          | 1                       | 0                      | 1             | 1         |         |                      |

a. P: postmarketing, C: common, F: frequent, 10: frequency  $\geq 10\%$

b. Number in column "Num-ADR" denotes the number of ADRs that suggest the drug

c. Number in row Total denotes the number of drugs detected by the heading ADR in total

d. Number in row Total-only denotes the number of drugs detected only by the heading ADR in total
